# Supplementary material for: Determining Dietary Patterns to Recommend for Type 2 Diabetes: An Umbrella Review
Source: MDPI journal article supplement (doi:10.3390/nu15040861), 2023-02-08
Supplement: s1 [file s1]

**Supplementary Table S4** Results from reviews on glycaemic control and weight among different dietary patterns: Mediterranean versus control diets difference in HbA1c, fasting blood glucose (FBG), fasting blood insulin (FBI) and body weight

| Review dietary characteristics            |                                                       |                                                                                                                                                                         |                                                                                                                              | Outcomes                                                                                                                   |                                                                                               |                                                                |                                                                   |
|-------------------------------------------|-------------------------------------------------------|-------------------------------------------------------------------------------------------------------------------------------------------------------------------------|------------------------------------------------------------------------------------------------------------------------------|----------------------------------------------------------------------------------------------------------------------------|-----------------------------------------------------------------------------------------------|----------------------------------------------------------------|-------------------------------------------------------------------|
| First author, year                        | No. of studies                                        | Intervention diets                                                                                                                                                      | Control diets                                                                                                                | HbA1c                                                                                                                      | FBG                                                                                           | FBI or non-FBI                                                 | Weight                                                            |
|                                           |                                                       | % CHO range (% Protein, % Fat, % MUFA), s= serves                                                                                                                       | [% CHO: % Protein: % Fat]                                                                                                    | Change (%) MD with 95% CI                                                                                                  | Change (mmol/L) MD with 95% CI                                                                | Change (mU/L) MD with 95% CI                                   | Change (Kg) MD with 95% CI Pooled data                            |
| Systematic review with meta-analysis A    |                                                       |                                                                                                                                                                         |                                                                                                                              |                                                                                                                            |                                                                                               |                                                                |                                                                   |
| Esposito, 2015                            | 3 T2D (of 8 studies with at risk, metabolic syndrome) | M diets; mostly plant based, high whole-grains, fruit, and veg                                                                                                          | LF diet or control diet                                                                                                      | Significantly favours M diet in meta-analysis. 3 long-term RCTs of T2D -0.5% (-0.56 to -0.38) P=0.0001.                    | NR                                                                                            | NR                                                             | No difference, NS MD=NR (range of MD -0.3 to 2.2kg) P=NR          |
| Huo, 2015                                 | 9 RCTs                                                | M diets, rich in fibre, vegetables, legumes, fruit, fish, MUFA, and limited red, processed meat and animal fats. [CHO: 35-55%, Protein: 15-20%, Fat: 10-40% (50% MUFA)] | HC diets, LF diets, regular diets, usual care, or American Diabetes Association. [CHO: 50-60%, Protein: 15-20%, Fat: 10-40%] | Significantly favours the M diet in MA of 9 studies. -0.3% (-0.46, -0.14) P<0.05                                           | Significantly favours in six studies -0.7 mmol/L (-1.24, -0.21) P=NR                          | Favours, NS in five studies -0.55 mU/L (-0.81, -0.29) P=NR     | Favours, NS in six studies -0.3kg (CI -0.55, -0.04) P=NR          |
| Qian, 2016 c                              | 24 T2D (of 28 studies including 4 MUFA v PUFA)        | High MUFA rich diets. 10-50% energy from CHO, (14-60% protein, 30-70% fat), 17-49% MUFA                                                                                 | High CHO diets. 41-64% energy from CHO, (12-23% protein: 10-39% fat), 10-19% MUFA                                            | Favours, NS in high MUFA diets. Fixed effects model -0.08% (-0.15, 0.00) or random effects model -0.11% (-0.24, 0.02) P=NR | Significantly favours in 22 studies. -0.6 mmol/L (-0.76, -0.39) or -0.6 (-0.76, -0.39) P<0.05 | No difference, NS in 11 studies. -0.6 mU/L (-1.41, -0.26) P=NR | Significantly favours in 16 studies. -1.6kg (-2.89, -0.23) P<0.05 |
| Systematic review with no meta-analysis B |                                                       |                                                                                                                                                                         |                                                                                                                              |                                                                                                                            |                                                                                               |                                                                |                                                                   |

|               |                                                        |                                                                                                                                                              |                               |                                                                                                                                     |                                                           |    |    |
|---------------|--------------------------------------------------------|--------------------------------------------------------------------------------------------------------------------------------------------------------------|-------------------------------|-------------------------------------------------------------------------------------------------------------------------------------|-----------------------------------------------------------|----|----|
| Sleiman, 2015 | 7 RCTs<br>(4 RCTs MDiet<br>for T2D, 3 T2D<br>subgroup) | M diets; rich in<br>fruit & veg,<br>breads,<br>cereals, olive<br>oil as fat (high<br>MUFA), low to<br>mod fish,<br>poultry,<br>alcohol & little<br>red meat. | Low fat diet or<br>usual diet | Favours, NS in<br>M diet. End<br>point results: 4<br>studies -0.3%<br>P = 0.012 to -<br>0.6% P<0.01, 2<br>studies NR, 1<br>study NS | Favours, NS in<br>4 studies, 2<br>NR, 1 NS<br>change P=NR | NR | NR |
|---------------|--------------------------------------------------------|--------------------------------------------------------------------------------------------------------------------------------------------------------------|-------------------------------|-------------------------------------------------------------------------------------------------------------------------------------|-----------------------------------------------------------|----|----|

---

*Note. A = Systematic reviews with meta-analysis – HbA1c and wt reduction are based on meta-analysis outcomes. B = Systematic reviews (without meta-analysis) – HbA1c and wt reduction are based on statistical analysis of individual reviews. c = monounsaturated fatty acid (MUFA) diets. d = includes type 1 diabetes (T1D). # = subgroup data, ^ = 12mo data. Abbreviations: Cal = calorie; CHO = carbohydrate; ER = energy restricted; HE = healthy eating; HCD = High carbohydrate diet; HPD = high protein diet; LC = Low-carbohydrate; LCMD = Low-carbohydrate; LF = low fat; LGI = low glycaemic index; MC = moderate carbohydrate; MD = mean difference; M diet = Mediterranean diet; MUFA = monounsaturated fatty acids; NR = not reported, NS = not significant, Paleo = Paleolithic diet, RCT = randomised control trial, SD = significant different; T2D = type 2 diabetes; TE = total energy; veg = vegetables; WMD = weighted mean difference; wt. = weight.*
