# Supplementary material for: Determining Dietary Patterns to Recommend for Type 2 Diabetes: An Umbrella Review
Source: MDPI journal article supplement (doi:10.3390/nu15040861), 2023-02-08
Supplement: s1 [file s1]

**Supplementary Table S5** Results from reviews on glycaemic control and weight among different dietary patterns: Plant-based versus control diets difference in HbA1c, fasting blood glucose (FBG), fasting blood insulin (FBI) and body weight

| Review dietary characteristics                    |                                           |                                                                                                               | Outcomes                                                                                                                               |                                                                                                                                                                          |                                                                                                         |                                                             |                                                                    |
|---------------------------------------------------|-------------------------------------------|---------------------------------------------------------------------------------------------------------------|----------------------------------------------------------------------------------------------------------------------------------------|--------------------------------------------------------------------------------------------------------------------------------------------------------------------------|---------------------------------------------------------------------------------------------------------|-------------------------------------------------------------|--------------------------------------------------------------------|
| First author, year                                | No. of studies                            | Intervention diet                                                                                             | Control diets                                                                                                                          | HbA1c                                                                                                                                                                    | FBG                                                                                                     | FBI or non-FBI Change                                       | Weight                                                             |
|                                                   |                                           | % CHO range<br>(% Protein: % Fat)                                                                             | [% CHO: % Protein % Fat]                                                                                                               | Change (%)<br>MD with 95% CI                                                                                                                                             | Change<br>(mmol/L) MD with 95% CI                                                                       | (mU/L) MD with 95% CI                                       | Change (Kg)<br>MD with 95% CI Pooled data                          |
| <b>Systematic review with meta-analysis A</b>     |                                           |                                                                                                               |                                                                                                                                        |                                                                                                                                                                          |                                                                                                         |                                                             |                                                                    |
| Viguioliouk, 2015 d                               | 9 in HbA1c analysis (of 13) 7 T2D & 2 T1D | Plant-based protein diet (soy, almond, pulses or mixed). 40-70% energy from CHO (9-30% protein, 20-40% fat)   | Animal-based protein diet (casein, milk, cheese, red meat or mixed) 40-70% energy from CHO (9-30% protein, 20-40% fat)                 | Significantly favours in 7 studies. T2D: -0.2%, (-0.26, -0.03). P=0.009. 2 studies T1D: MD -0.6% (95% CI -1.43, -0.15) P=0.1 Total: -0.2%, (95% CI -0.26, -0.05) P=0.005 | Significantly favours. Total: -0.5 mmol/L (-0.92, -0.13) P=0.009                                        | Significantly favours. T2D -1.5 mU/L (-2.49, -0.41) P=0.006 | NR                                                                 |
| Viguioliouk, 2019 d                               | 9 RCTs including T2D & T1D                | Vegetarian protein, LF vegan, vegetarian, or vegan diets. 49-78% energy from CHO (12-17% Protein, 11-34% fat) | Animal protein diets as LF diet, ADA, EASD, KDA or portion control or usual diets. 47-65% energy from CHO (16-22% protein, 19-37% fat) | Significantly favours vegetarian diets in 8 trials. MD -0.3% (-0.45, -0.12), SMD -1.2% (-1.89, -0.50) P=0.0006                                                           | Significantly favours in 6 trials. MD -0.6 mmol/L, (-0.99, -0.13), SMD -1.0mmol/L (-1.84, -0.24) P=0.01 | NR but 1 study favours. -1.1 mU/L (-4.02, 1.74), P=0.44     | Significantly favours in 6 trials. -2.2kg (-2.95, -1.34) P<0.00001 |
| Yokoyama, 2014                                    | 6 studies T2D                             | LF vegan, vegan, or lacto-ovo low-protein                                                                     | Omnivorous, ADA, standard diabetes diet, or LF diet                                                                                    | Significantly favours vegetarian diets. -0.4% (-0.62 to -0.15), P=0.001                                                                                                  | No difference, NS. -0.4% (-1.04 to 0.32) P=0.3                                                          | NR                                                          | NR                                                                 |
| <b>Systematic reviews with no meta-analysis B</b> |                                           |                                                                                                               |                                                                                                                                        |                                                                                                                                                                          |                                                                                                         |                                                             |                                                                    |
| Toumpanakis, 2018                                 | 8 T2D studies in analysis (of 13)         | LF plant-based, vegan or LF vegan                                                                             | Omnivorous, KDA, EASD, IADD or LF diets.                                                                                               | Favours, NS. plant-based diets, 8 studies reduced HbA1c. -0.4% (analysis in 2 studies MD -0.9% P=0.002)                                                                  | NR                                                                                                      | NR                                                          | NR                                                                 |

|                  |                                  |                                                                                    |                                                  |                                                                                    |                         |    |    |
|------------------|----------------------------------|------------------------------------------------------------------------------------|--------------------------------------------------|------------------------------------------------------------------------------------|-------------------------|----|----|
| Johannesen, 2020 | 3 T2D (in analysis of 9 studies) | LF plant-based, vegan, LF, Low calorie lacto-ovo vegetarian, LF vegan or LGI vegan | Omnivorous, KDA, Low calorie, M diet, ADA or AHA | No difference, NS. Only 1 study including T2D flavours a difference in HbA1c. P=NR | No difference, NS. P=NR | NR | NR |
|------------------|----------------------------------|------------------------------------------------------------------------------------|--------------------------------------------------|------------------------------------------------------------------------------------|-------------------------|----|----|

---

*Note. A = Systematic reviews with meta-analysis – HbA1c and wt. reduction are based on meta-analysis outcomes. B = Systematic reviews (without meta-analysis) – HbA1c and wt. reduction are based on statistical analysis of individual reviews. d = includes type 1 diabetes (T1D). # = subgroup data. ^ = 12mo data. Abbreviations: ADA; American Diabetes Association; AHA = American Heart Association; CHO = carbohydrate; EASD = European Association for the study of diabetes guidelines; HE = healthy eating; HC = high carbohydrate; HPD = high protein diet; IADD = Italian Association of Doctors of Diabetology guidelines; KDA = Korean Diabetes Association; LC = low-carbohydrate; LF = Low fat; LGI = low glycaemic Index; MD = mean difference; M = Mediterranean; NR = not reported; NS = not significant; T2D = type 2 diabetes; TE = total energy; WMD = weighted mean difference; wt. = weight.*
