# Supplementary material for: Determining Dietary Patterns to Recommend for Type 2 Diabetes: An Umbrella Review
Source: MDPI journal article supplement (doi:10.3390/nu15040861), 2023-02-08
Supplement: s1 [file s1]

**Supplementary Table S7** Results from reviews on glycaemic control and weight among different dietary patterns: Multi-intervention versus control difference in HbA1c, fasting blood glucose (FBG), fasting blood insulin (FBI) and body weight

| Review dietary characteristics                   |                                 |                                                                                                                                                                        |                                                                                                                                                      | Outcomes                                                                      |                                |                       |                                                        |
|--------------------------------------------------|---------------------------------|------------------------------------------------------------------------------------------------------------------------------------------------------------------------|------------------------------------------------------------------------------------------------------------------------------------------------------|-------------------------------------------------------------------------------|--------------------------------|-----------------------|--------------------------------------------------------|
|                                                  | No. of studies                  | Intervention diets                                                                                                                                                     | Control diets                                                                                                                                        | HbA1c                                                                         | FBG                            | FBI or non-FBI Change | Weight                                                 |
| First author, year                               | Population                      | CHO range (% Energy or g/day)                                                                                                                                          | [% CHO: % Protein % Fat]                                                                                                                             | Change (%) MD with 95% CI                                                     | Change (mmol/L) MD with 95% CI | (mU/L) MD with 95% CI | Change (Kg) MD with 95% CI Pooled data                 |
| <b>Systematic review with meta-analysis A</b>    |                                 |                                                                                                                                                                        |                                                                                                                                                      |                                                                               |                                |                       |                                                        |
| Ajala, 2013                                      | 16 in analysis (of 20 RCTs) T2D | Various diets included:                                                                                                                                                | Control diets included:                                                                                                                              | All diets significantly favour HbA1c outcomes:                                | NR                             | NR                    | Various Outcomes:                                      |
|                                                  |                                 | LC diets, 13%-60% E from CHO (or 20-120g CHO/ d)                                                                                                                       | LF diets, 44-55% E from CHO or 190-230g CHO                                                                                                          | 8 LC diets, -0.12% (-0.24, -0.00) P=0.04                                      |                                |                       | LC diets: -0.7kg, (-1.77, 0.39) P=0.2                  |
|                                                  |                                 | HP diets (HPD), 45-45% E from CHO                                                                                                                                      | LP diets, 48-55% E from CHO                                                                                                                          | 2 HP diets: -0.28%, (-0.38, -0.18) P<0.00001                                  |                                |                       | HP diets: 0.4kg (-0.96, 1.84) P=0.5                    |
|                                                  |                                 | M diets, Vegetarian or vegan diets, 60-75% energy from CHO (or MDiet food score)                                                                                       | Control diets (LF, or conventional), 60-70% energy from CHO (or M diet food score)                                                                   | 3 M diets: -0.5%, (-0.64, 0.30) P<0.00001                                     |                                |                       | M diets: -1.8kg (2.54, -1.15) P<0.00001                |
|                                                  |                                 | LGI diets, High-fiber diets, 37-50% E from CHO                                                                                                                         | High-GI diet, or ADA diet, 38-50% E from CHO                                                                                                         | 3 LGI diets: -0.1%, (-0.23%, -0.03) P=0.008                                   |                                |                       | LGI diets: 1.4kg (-0.58, 4.36,) P=0.4                  |
| <b>Systematic review with no meta-analysis B</b> |                                 |                                                                                                                                                                        |                                                                                                                                                      |                                                                               |                                |                       |                                                        |
| Emadian, 2015                                    | 11 RCTs T2D over wt./ obese     | Various interventions, all % energy (E) from CHO: LF, 55-60%; High MUFA, 45%; LF, NR; LC M diet, LGI 35%; LF vegan, 75%; LCMD, 50%; ADA, 60-70%; Wt. Mx, 55%; HPD, 40% | Various control diets, all % energy (E) from CHO: LC, 20%; HC, 60%; GL, NR; ADA, 50%; ADA, 60-70%; LF, NR; LGI, NR; Fibre modified, 45-55%; HCD, 55% | All diets favour, NS. HbA1c outcomes: MD range -0.05%, P=0.4 to -0.7%, P=0.01 | NR                             | NR                    | All favour: MD ranges -0.06kg, P= 0.8 to -3.1kg, P=0.3 |

|                  |             |                                                                                                                                                                                                                                                                                                                                  |                                                                                                                                                                                                                         |                                                                                                                                                                                                                                                                                        |    |    |                                                           |
|------------------|-------------|----------------------------------------------------------------------------------------------------------------------------------------------------------------------------------------------------------------------------------------------------------------------------------------------------------------------------------|-------------------------------------------------------------------------------------------------------------------------------------------------------------------------------------------------------------------------|----------------------------------------------------------------------------------------------------------------------------------------------------------------------------------------------------------------------------------------------------------------------------------------|----|----|-----------------------------------------------------------|
| Papamichou, 2019 | 20 RCTs T2D | Various interventions, all % energy from CHO: 9 LC, 14-35%; 2 LC M diet, 35%; 1 LC or LF wt. loss, 60%; 1 Atkins, wt loss (25-40g CHO); 3 HPD, 40%; 9 LC, 14-35%; 2 LC M diet, 35%; 1 LC or LF wt. loss, 60%; 1 Atkins, wt loss (25-40g CHO); 3 HP, 40%; 1 M diet lifestyle; 1 Vegan, 75%; 1 Ma-Pi , 67%; 1 Vegetarian diet, 60% | Various control diets, all % energy from CHO: LF diet, LGI, high GI, 42-60%; TM or ADA, 50-55%; Usual Care, 55%; ADA (1200-1550 kcal/d); LPD, 49-55%; Usual care; Conventional, 60-70%; Control, 50%; Conventional, 50% | Various HbA1c outcomes: 12 LC studies 2 of 12 favours NS; 2 LC M diet studies significantly favour; 1 LC wt. loss favours NS; 1 Atkins NS difference; 3 HP NS difference; 1 M diet favours NS; 1 vegan favours NS; 1 Ma-Pi diet favours NS; 1 Vegetarian NS difference; All diets P=NR | NR | NR | Various favour, NS: 2 LC; 2 LC M diet; 1 Vegetarian; P=NR |
|------------------|-------------|----------------------------------------------------------------------------------------------------------------------------------------------------------------------------------------------------------------------------------------------------------------------------------------------------------------------------------|-------------------------------------------------------------------------------------------------------------------------------------------------------------------------------------------------------------------------|----------------------------------------------------------------------------------------------------------------------------------------------------------------------------------------------------------------------------------------------------------------------------------------|----|----|-----------------------------------------------------------|

---

Note. A = Systematic reviews with meta-analysis – HbA1c and wt. reduction are based on meta-analysis outcomes. B = Systematic reviews (without meta-analysis) – HbA1c and wt. reduction are based on statistical analysis of individual reviews. # = subgroup data. ^ = 12mo data. Abbreviations: ADA = American Diabetes Association; CD = control diet; CHO = carbohydrate; DASH = dietary approaches to stop hypertension; DIG = dietary intervention group; E = energy; ER = energy restricted; GI = glycaemic index; GL = glycaemic load; HC = high carbohydrate; HP = high protein diet; LC = low-carbohydrate; LF = low fat; LP = low protein; Ma-Pi = macrobiotic vegan diet; M diet= Mediterranean diet; MC = moderate carbohydrate; MD = median difference; MUFA = monounsaturated fatty acids; NR = not reported; PUFA = polyunsaturated fatty acids; SD = standard deviation; S = significant difference; SMD = standardised mean difference; T1D = type 1 diabetes; T2D = type 2 diabetes; TM = traditional Mediterranean; vs = versus; WMD = weighted mean difference; wt. = weight.
