# Supplementary material for: Determining Dietary Patterns to Recommend for Type 2 Diabetes: An Umbrella Review
Source: MDPI journal article supplement (doi:10.3390/nu15040861), 2023-02-08
Supplement: s1 [file s1]

**Supplementary Table S3** Results from reviews on glycaemic control and weight among different dietary patterns: Low carbohydrate versus control diets difference in HbA1c, fasting blood glucose (FBG), fasting blood insulin (FBI) and body weight

| Review dietary characteristics         |                                  |                                                                               | Outcomes                                                                                                                     |                                                                                          |                                                           |                                               |                                                                      |
|----------------------------------------|----------------------------------|-------------------------------------------------------------------------------|------------------------------------------------------------------------------------------------------------------------------|------------------------------------------------------------------------------------------|-----------------------------------------------------------|-----------------------------------------------|----------------------------------------------------------------------|
| First author, year                     | No. of RCTs                      | Intervention diets                                                            | Control diets                                                                                                                | HbA1c                                                                                    | FBG                                                       | FBI or non-FBI                                | Weight (wt.)                                                         |
|                                        |                                  | CHO range (% Energy or g/day)                                                 | % CHO or % total fat or low calorie - (kcal/day)                                                                             | Change (%) MD with 95% CI                                                                | Change (mmol/L) MD with 95% CI                            | Change (mU/L) MD with 95% CI                  | Change (Kg) MD with 95% CI Pooled data                               |
| Systematic review with meta-analysis A |                                  |                                                                               |                                                                                                                              |                                                                                          |                                                           |                                               |                                                                      |
| Fan, 2016                              | 10 T2D                           | LC diets 20-70g/d of CHO (or 20-50% CHO of total energy (E) 1500-1800 kcal/d) | LF diets >30% energy fat (>10% SFA). HC diets (50-60% E from CHO) or usual/ADA diet. (50-60% E from CHO of 1400-1800 kcal/d) | Significantly favours LC diets in 10 studies. -0.3% (-0.51, -0.151), P<0.001             | NR                                                        | NR                                            | Significantly favours -2.3kg (-3.65, -1.06) P<0.001                  |
| Goldenberg, 2021                       | 23 Trials                        | LC diets 20-50/d of CHO, 70-130g/d, energy restricted                         | LF diets, iso-caloric                                                                                                        | Significantly favours LC diets in 17 studies. 0.5% (- 1.19, -0.27) 0.60, -0.34) P<0.001  | No difference, NS in 14 studies -0.7 (- 1.19, -0.27) P=NR | NR                                            | Significantly favours in 18 studies MD - 3.5kg (-5.2, - 1.7) P<0.001 |
| Huntriss, 2018                         | 7 in MA (of 18 studies) T2D      | LC diets 20-50g/day of CHO (or 20-50% energy from CHO or <130g/d)             | Usual care diets 50-60% energy from CHO                                                                                      | Significantly favours LC diets in 7 studies analysing HbA1c. -0.3% (-0.53, -0.02) P=0.03 | NR                                                        | NR                                            | NS difference in 10 studies 0.2kg (95% CI - 1.37, 1.92) P=0.7        |
| Jamka, 2020 a                          | 3 in MA (of 4 studies) GMD (T2D) | Paleolithic (paleo) diets 32-52% energy from CHO                              | HE diets or M diet, 42-52% energy from CHO                                                                                   | No difference, NS in 3 paleo diet studies analysing HbA1c. -0.4% (-0.87, 0.11) P=0.1     | No difference, NS -0.3 (-0.87, 0.18) P=0.2                | No difference, NS -0.1 mU/L (-0.6, 0.3) P=0.5 | No difference, NS in 3 studies. Range of MD -0.3, to - 13kg, P=NR    |
| Korsmo-Haugen, 2019                    | 16 in MA (of 23 studies) T2D     | LC diets 20-70g/d of CHO (or 5-40% energy from CHO)                           | HC diets 52g/d of CHO or 40-60% energy from CHO                                                                              | Favours, NS in LC diets and HE in 16 studies. MD - 0.09% (-0.17, - 0.01) tested # P=0.01 | NR                                                        | NR                                            | Favours, NS in 16 (+1) studies. -0.4 kg (-0.91, 0.21) P=0.07         |

|                 |                                    |                                                                                                    |                                                                                                                      |                                                                                                                                                                |                                             |    |                                                                                                                                       |
|-----------------|------------------------------------|----------------------------------------------------------------------------------------------------|----------------------------------------------------------------------------------------------------------------------|----------------------------------------------------------------------------------------------------------------------------------------------------------------|---------------------------------------------|----|---------------------------------------------------------------------------------------------------------------------------------------|
| Li, 2021        | 12 T2D                             | LC diets 20-50g/d, 70-130g/d of CHO or 20% energy from CHO                                         | LF diets, 25-30% energy from fat, 45-60% energy from CHO                                                             | Significantly favours with LC diet. MD -0.4% (95% CI -0.45, -0.24) P<0.00001                                                                                   | NR                                          | NR | Significantly favours -3kg (-4.36, -1.63) P<0.00001                                                                                   |
| McArdle, 2019   | 25 T2D                             | VLCD diets, 20-50g/d to low CHO diets, (LC diet 70-130g/d to moderate CHO diets, 128-232g/d of CHO | LF diets, HC, M diet calorie-restricted diets, Low calorie diets, LGI, or LP diets, or LF-HC: 50-60% energy from CHO | No difference, NS in pooled effect -0.09%, (-0.27, 0.08) P=0.3 VLCD: -0.1% (-0.34, 0.08) P=0.2 LC: -0.5% (-0.75, -0.23) P=0.0002, MC: 0.1% (-0.17, 0.37) P=0.5 | NR                                          | NR | No difference, NS -0.1kg (-0.33, 0.08) P=0.2                                                                                          |
| Meng, 2017      | 9 T2D                              | LC diets 20-130g of CHO (or 5-20% energy from CHO)                                                 | HC diets or usual diets, 50-60% energy from CHO (or unclear)                                                         | Significantly favours HbA1c with LC diets -0.4% (95% CI -0.61, -0.26) P=0                                                                                      | No difference, NS -0.05 (-0.58, 0.47) P=0.8 | NR | No difference, NS but favours in subgroup # analysis. WMD -0.9kg (95% CI -0.92, 0.05) P=0.06                                          |
| Naude, 2014 #   | 5 include T2D (of 19 studies)      | LC diets <45% energy from CHO, various energy restrictions                                         | Wt loss diets >65% energy from CHO, and energy balance                                                               | No difference, NS in LC diet subgroup# with T2D. 3-6mo: 0.2% (-0.0, 0.39) 1-2yrs: 0.01%, (-0.28, 0.30) P=NR                                                    | NR                                          | NR | NS difference in # T2D. 3-6mo. 5 trials MD 0.82 kg (95% CI -1.25 to 2.9) P=0.4, 1-2 yr. 4 trials MD 0.9kg, (95% CI -2.08, 3.89) P=0.6 |
| Sainsbury, 2018 | 12 in analysis (of 25 studies) T2D | VLCD and LC diets ≤ 45% energy from CHO, LCD <26% E from CHO. MC diets 26-45% E from CHO           | HC diets ≥45% energy from CHO, and LF, HE, ADA, LGI, M Diet or usual diet                                            | Favours, NS reduction at 3mo. in LC, no change in MC. 3mo: -0.2% (-0.33, -0.05) P=0.008. 6mo: -0.2% (-0.31, 0.02) P=0.09. 12mo: -0.09% (-0.21, 0.03) P=0.1     | NR                                          | NR | No difference, NS in 9 studies. 6 mo: -0.1kg (95% CI -0.93, 0.65). 10 studies 12 mo: -0.1kg (95% CI -0.93, 0.07) P=NR                 |

|                  |                             |                                                       |                                  |                                                                                                                                                                                       |                                                                                                     |    |                                                                                                    |
|------------------|-----------------------------|-------------------------------------------------------|----------------------------------|---------------------------------------------------------------------------------------------------------------------------------------------------------------------------------------|-----------------------------------------------------------------------------------------------------|----|----------------------------------------------------------------------------------------------------|
| Snorgaard, 2017  | 8 in MA (of 10 studies) T2D | LC diets to moderate CHO diets 14-42% energy from CHO | HC diets 48-55% energy from CHO. | Favours, NS in LC diets lowering HbA1c short term only. 3-6mo. -0.3% (-0.63, -0.06) P=0.02. 12mo. 0.04% (-0.04, 0.13) P=0.29                                                          | NR                                                                                                  | NR | No difference, NS in 7 studies less than 1 yr: (1.02, -1.03) over 1 yr. studies (1.36, -0.97) P=NR |
| van Zuuren, 2018 | 14 in analysis (of 36) T2D  | LC diets 20-130g of CHO/d (or 10-40% energy from CHO) | LF diets 45-70% energy from CHO  | Favours, NS in LC diets slightly in 14 studies. 16wks: -0.6% (-0.91, -0.12) 0.93, -0.17) 2yrs: 0.4 (-1.22, 0.48) 26wks: -0.3% (-0.50, -0.02) P=0.04. 2yrs: -0.2% (-0.37, -0.41) P=0.9 | No difference, NS 16wks: -1.0 (-1.66, -0.28) 26wk: -0.5 (-0.91, -0.12) 2yrs: 0.4 (-1.22, 0.48) P=NR | NR | No difference, NS in 16 studies. 26wks -0.2kg (95% CI -1.65, 1.27) P=NR                            |
| Yu, 2020 b       | 13 T2D                      | HP diet, >25% energy from protein                     | HC diet                          | No difference, NS when data is pooled. MD -0.01% (95% CI -0.11, 0.10) P=0.9                                                                                                           | No difference, NS MD -0.1 (95% CI -0.46, 0.19) P=0.43                                               | NR | NR                                                                                                 |

#### Systematic review with no meta-analysis B

|                |                            |                                                                             |                                                                           |                                                                                      |    |    |    |
|----------------|----------------------------|-----------------------------------------------------------------------------|---------------------------------------------------------------------------|--------------------------------------------------------------------------------------|----|----|----|
| Malaeb, 2019 b | 7 RCTs (of 21 studies) T2D | HP diet 40% energy from CHO, 30% protein, 30% fat (21-30% protein consumed) | Control diet or usual diet. 55% energy from CHO, 15%-20% protein, 30% fat | No difference, NS based on 6 of 7 studies for HbA1c (range of MD 0.1% to -1.5% P=NR) | NR | NR | NR |
| Yamada, 2018   | 3 T2D                      | LC diet 70-180g/d energy from CHO (ER 1800 kcal)                            | HC diet 248g/d (ER 1800 kcal) or ideal body wt. x 25-28 kcal/d            | Favours, NS in LC diets short term (range of MD -0.4% to -0.7% P=NR)                 | NR | NR | NR |

*Note. A = Systematic reviews with meta-analysis – HbA1c and wt reduction are based on meta-analysis outcomes. B = Systematic reviews (without meta-analysis) – HbA1c and wt reduction are based on statistical analysis of individual reviews. a = Paleolithic diets. b = High protein diets. d = includes type 1 diabetes (T1D). # = subgroup data. . Abbreviations: CHO = carbohydrate; ER = energy restricted; HE = healthy eating; HC = High carbohydrate; HP = high protein; kcal = kilocalorie (calorie); LC = low carbohydrate; LCMD = Low carbohydrate Mediterranean diet; LF = low fat; LGI = low glycaemic index; LP = low protein; MA = meta-analysis; MC = moderate carbohydrate; MD = mean difference; M diet = Mediterranean diet; NR = not reported; NS = not significant; SD = significant different; T1D = type 1 diabetes; T2D = type 2 diabetes; TE = total energy; VLCD = very low carbohydrate diets; WMD = weighted mean difference; wt. = weight.*
