# Supplementary material for: Determining Dietary Patterns to Recommend for Type 2 Diabetes: An Umbrella Review
Source: MDPI journal article supplement (doi:10.3390/nu15040861), 2023-02-08
Supplement: s1 [file s1]

**Supplementary Table S6** Results from reviews on glycaemic control and weight among different dietary patterns: Low-Glycaemic versus control diets difference in HbA1c, fasting blood glucose (FBG), fasting blood insulin (FBI) and body weight

| Review dietary characteristics         |                         |                                         | Outcomes                                                           |                                                                                                      |                                                                          |                                                                       |                                                                  |
|----------------------------------------|-------------------------|-----------------------------------------|--------------------------------------------------------------------|------------------------------------------------------------------------------------------------------|--------------------------------------------------------------------------|-----------------------------------------------------------------------|------------------------------------------------------------------|
| First author, year                     | No. of studies          | Intervention diet                       | Control diets                                                      | HbA1c                                                                                                | FBG                                                                      | FBI or non-FBI                                                        | Weight                                                           |
|                                        |                         | % CHO range (GI score)                  | [% CHO: % Protein % Fat]                                           | Change (%)<br>MD with 95% CI                                                                         | Change (mmol/L) MD with 95% CI                                           | Change (mU/L) MD with 95% CI                                          | Change (Kg) MD with 95% CI Pooled data                           |
| Systematic review with meta-analysis A |                         |                                         |                                                                    |                                                                                                      |                                                                          |                                                                       |                                                                  |
| Ojo, 2019                              | 6 in MA (of 9 RCTs) T2D | LGI diet or LGI legume diet             | Higher-GI diet (GI ≥ 70 for high-GI diet) and/or control diet.     | Favours, NS. LGI diets in 2 studies -0.5% (-0.61 to -0.39) of 6 studies.                             | Significantly favours in 4 MA studies. P>0.05                            | NR                                                                    | NR                                                               |
| Zafar, 2019                            | 54 (21 RCTs T2D)        | LGI diets effects on glycaemic control. | High GI / fibre diets, healthy diets, LF/ HF diets, diabetes diets | Significantly favours LGI diets in 26. Type 2 diabetes in 21 studies # SMD - 0.2% (-0.3, -0.09) P=NR | Significantly favours in 26 studies SMD - 0.2 mmol/L (-0.27, -0.07) P=NR | No difference, NS in 14 studies SMD - 0.03 mmol/L (-0.21, -0.15) P=NR | No difference, NS in 24 studies SMD - 0.1 kg (-0.19, -0.01) P=NR |

Note. A = Systematic reviews with meta-analysis – HbA1c and wt. reduction are based on meta-analysis outcomes. B = Systematic reviews (without meta-analysis) – HbA1c and wt. reduction are based on statistical analysis of individual reviews. # = subgroup data. Abbreviations: GI = glycaemic Index; HF = high fat; LF = low fat; LGI = low-glycaemic Index; MD = mean difference; NR = not reported; NS = not significant; T2D = type 2 diabetes; WMD = weighted mean difference; wt. = weight.
