# Supplementary material for: Determining Dietary Patterns to Recommend for Type 2 Diabetes: An Umbrella Review
Source: MDPI journal article supplement (doi:10.3390/nu15040861), 2023-02-08
Supplement: s1 [file s1]

**Supplementary Table S2** Characteristics of dietary pattern reviews for diabetes

| Low carbohydrate                       |                                                                                                   |                    |                                        |                                                                                       |                                                                                               |                 |
|----------------------------------------|---------------------------------------------------------------------------------------------------|--------------------|----------------------------------------|---------------------------------------------------------------------------------------|-----------------------------------------------------------------------------------------------|-----------------|
| Author of study                        | Countries                                                                                         | No. of studies     | Participants (n= number)<br>Age (yrs.) | Intervention/<br>objective (CHO % energy/day)                                         | Comparison/<br>control (CHO % energy/day)                                                     | Duration        |
| Systematic review with meta-analysis A |                                                                                                   |                    |                                        |                                                                                       |                                                                                               |                 |
| Fan, 2016                              | 4 USA, 2 Israel, 1 Sweden, 1 Italy, 1 UK, 1 Japan                                                 | 10 RCTs            | T2D (n= 997)<br>Age ≥ 18 Δ             | Effect of LCD on glycemic control, lipids, and wt loss. (20-60g, 30-130g)             | Control LF or calorie energy restricted or macro-nutrient (CHO 50-60%, Fat <30% Protein <20%) | 12 to 224 weeks |
| Goldenberg, 2021 #                     | Multiple NR                                                                                       | 23 Trials          | T2D (n=1357)<br>Age 47-67              | Efficacy, safety, certainty of LC diet outcomes. (<26% or <130g, <10% or <50g)        | Control in 18 of 23 used LF diets                                                             | 25 to 52 weeks  |
| Huntriss, 2018                         | Multiple NR                                                                                       | 18 RCTs (7 in MA)  | T2D (n= 2204)<br>Age ≥ 18 Δ            | Effect of LC diet (various) on glycemic control. (20-52%, or <20-130g)                | Usual care diets, (>48%)                                                                      | 12 to 224 weeks |
| Jamka, 2020 a                          | 2 Sweden, 1 Netherlands, 1 USA                                                                    | 4 RCTs (3 in MA)   | GMD+ (n= 98)<br>Age: 52-66 (SD 6-13) □ | Paleolithic diet effect on glucose and insulin homeostasis. (32-52%)                  | Various healthy diets (M diet, diabetes diet or Dutch Health Council diet) HE diets (42-52%)  | 2 to 12 weeks   |
| Korsmo-Haugen, 2019                    | 2 USA (4 USA, 5 Australia, 3 Israel, 3 Sweden, 2 Canada, 1 New Zealand, 1 Austria, 1 Japan, 1 UK) | 23 RCTs (16 in MA) | T2D (n= 2178)<br>Age: NR               | Effects of LC diets on body wt, lipid profile, BP & glycaemic control. (5-40% or 39g) | Higher CHO diets (40-60% to 52g)                                                              | 14 to 112 weeks |
| Li, 2021                               | 3 USA, 2 Sweden, 2 Japan, 1 China, 1 UK, Spain, 1 Australia, 1 Italy                              | 12 RCTs            | T2D (n=761)<br>Age: 53-65 □            | Assess difference between LC diets and LF diets. LC diet (20-50g, <20%, <130g)        | LF diet (<25-30%) or HC (50-60%)                                                              | 13 to 104 weeks |

|                  |                                                                                                                      |                                       |                                                  |                                                                                                |                                                                                                      |                 |
|------------------|----------------------------------------------------------------------------------------------------------------------|---------------------------------------|--------------------------------------------------|------------------------------------------------------------------------------------------------|------------------------------------------------------------------------------------------------------|-----------------|
| McArdle, 2019    | 6 Australia, 4 USA, 3 UK, 2 Israel, 2 Sweden, 2 Japan, 2 New Zealand, 1 Israel, 1 Canada, 1 Italy, 1 Malaysia        | 25 RCTs                               | T2D (n= 2132)<br>Age: 52-64 □                    | CHO restriction compared for HbA1c, and CHO consumed. VLCD: 20-50g, LCD: 70-130g MCD: 128-232g | LF, low calorie, M diet, or LF (AHA), ADA, LF, HC, LGI, JDA, low calorie, DM diet, LP. (CHO: 50-60%) | 12 to 208 weeks |
| Meng, 2017       | 4 USA, 1 Australia, 1 UK, 1 Israel, 1 Sweden, 1 Japan                                                                | 9 RCTs                                | T2D (n= 734)<br>Age: NR                          | Efficacy of LC diets (5-20% to 20-130g)                                                        | Normal or HC diets (50-60% to unclear)                                                               | 12 to 112 weeks |
| Naude, 2014 #    | 5 USA, 4 Australia, 2 Spain, 1 UK, 1 Germany, 1 Norway, (1 Sweden, 3 Australia, 1 New Zealand)                       | 19 studies (5 RCTs T2D)               | O/ wt. or obese #T2D (n= 720) Age: 39-73 MR      | Wt loss diets as LC more effective; to prevent CVD. T2D subgroups. Included HFD and HPD (<45%) | Isoenergetic balanced wt loss diets (CHO >65%)                                                       | 12 to 112 weeks |
| Sainsbury, 2018  | 7 USA, 6 Australia, 2 UK, 2 Canada, 1 Israel, 1 Sweden, 1 Japan, 1 Czech Republic, 1 New Zealand, 1 Austria, 1 Japan | 25 RCTs (12 in MA)                    | T2D (T1D) (n= 2412) Age: 52-63 □ (T1D 37.9 Mean) | CHO restricted diets effects on glycaemic control. (<10%, <26%, MCD 26-45%, ≤45%)              | Comparison with HC diet (CHO ≥45%)                                                                   | 10 to 112 weeks |
| Snorgaard, 2017  | 3 USA, 2 Australia, 1 Israel, 1 Sweden, 1 Canada 1 New Zealand, 1 Japan,                                             | 10 RCTs (8 in MA)                     | T2D (n= 1376)<br>Age: 54-62 □                    | Diets with low to moderate CHO, LCD (14-42%, E% <45%)                                          | Compared to diets with HC. (CHO 48-55%)                                                              | 12 to 112 weeks |
| van Zuuren, 2018 | 12 USA, 9 UK, 2 Australia, 2 Israel, 2 Spain, 2 Japan, 1 Sweden, 1 Italy, 1 Mexico, 1 Canada (2 USA, 1 Sweden CCTs)  | 36 studies (33 RCTs, 3 CCTs) 14 in MA | T2D (n= 2161)<br>Age: 32-65 MR                   | LC diets reduced markers of metabolic syndrome; diet (10-40% to 20-130g, ≤40% of energy).      | Compared to LF diets (45-70%) fat ≤30%                                                               | ≥4 weeks        |

|            |             |         |                                     |                                                                                               |                                        |           |
|------------|-------------|---------|-------------------------------------|-----------------------------------------------------------------------------------------------|----------------------------------------|-----------|
| Yu, 2020 b | Multiple NR | 13 RCTs | T2D (n= 1138)<br>Age: 54- 63.7<br>□ | Effects of a HP diets (Protein >25%, 25-33%, CHO: 14 -45%) on glycemic control, HOMA IR & BP. | HC diets (CHO 45-60%, Protein: 15-21%) | >12 weeks |
|------------|-------------|---------|-------------------------------------|-----------------------------------------------------------------------------------------------|----------------------------------------|-----------|

#### Systematic reviews with no meta-analysis B

|                |             |                     |                                      |                                                                                                 |                                                                       |               |
|----------------|-------------|---------------------|--------------------------------------|-------------------------------------------------------------------------------------------------|-----------------------------------------------------------------------|---------------|
| Malaeb, 2019 b | Multiple NR | 21 studies (7 RCTs) | T2D (n= 906)<br>Age: NR              | HP diets (Protein 30%, 17-62%) to improve glycemic outcomes. (HP ≥typical US diet (>16% of TE). | Control diet as protein. Some uncontrolled interventions. (P: 15-20%) | 2 to 42 weeks |
| Yamada, 2018   | 3 Japan     | 3 RCTs              | T2D (n= 105)<br>Age: 54.3-63.3<br>MR | Effect of energy restricted & CHO restricted diets (70-180g or ER 1800 kcal)                    | ER or HC diets 2 studies (1 E restricted, 1 CHO rich)                 | 1 to 28 weeks |

#### Mediterranean

| Author of study                        | Country                                                  | No. of studies               | Participants (n= number)<br>Age (yrs.)          | Intervention/ objective (CHO % energy/day)                                                                                                                        | Comparison/ control (CHO % energy/day)                                                                                        | Duration          |
|----------------------------------------|----------------------------------------------------------|------------------------------|-------------------------------------------------|-------------------------------------------------------------------------------------------------------------------------------------------------------------------|-------------------------------------------------------------------------------------------------------------------------------|-------------------|
| Systematic review with meta-analysis A |                                                          |                              |                                                 |                                                                                                                                                                   |                                                                                                                               |                   |
| Esposito, 2015                         | Multiple NR                                              | 8 MA (4 T2D), 5 RCTs (3 T2D) | T2D adults with or at risk (n= 2840)<br>Age: NR | Diets describing themselves as M diet to improve glycaemic control.                                                                                               | Control diets, mainly low-fat diets.                                                                                          | At least 26 weeks |
| Huo, 2015                              | 3 USA, 2 Israel, 1 Australia, 1 Spain, 1 Italy, 1 Greece | 9 RCTs                       | T2D (n= 1178)<br>Age: 26-75                     | Mediterranea n-style diets, rich in fibre, vegetables, legumes, fruit, fish, MUFA, and limited red, processed meat and animal fats. Protein: 15-20%, Fat: 10-40%] | High CHO diets, LFD, regular diets, usual care, or American Diabetes Association. [CHO: 50-60%, Protein: 15-20%, Fat: 10-40%] | At least 4 weeks  |

|              |             |                           |                               |                                                                                                                |                                                                                                                             |               |
|--------------|-------------|---------------------------|-------------------------------|----------------------------------------------------------------------------------------------------------------|-----------------------------------------------------------------------------------------------------------------------------|---------------|
| Qian, 2016 c | Multiple NR | 28 RCTs (24 MUFA vs. CHO) | T2D (n= 1,460) Age: 45-73.9 □ | Diets high in MUFA improve T2D metabolic risk factors. [CHO: 10-60%, Protein: 13-60%, Fat: 30-69 (17-49 MUFA)] | High CHO diets (or MUFA vs. PUFA diets). Some trials more than two arms [CHO:41-64: Protein 12-23, Fat: 10-49 (1-19% MUFA)] | 2 to 52 weeks |
|--------------|-------------|---------------------------|-------------------------------|----------------------------------------------------------------------------------------------------------------|-----------------------------------------------------------------------------------------------------------------------------|---------------|

#### Systematic review with no meta-analysis B

|               |             |                                 |                                    |                                                                                                                                                      |                                            |                 |
|---------------|-------------|---------------------------------|------------------------------------|------------------------------------------------------------------------------------------------------------------------------------------------------|--------------------------------------------|-----------------|
| Sleiman, 2015 | Multiple NR | 7 RCTs (4 RCTs, 3 T2D subgroup) | T2D or subgroup (n= 1,428) Age: NR | MDiet favorable for glycaemic control. Rich in fruit and veg, bread, cereals, olive oil as fat, low-mod fish, poultry, alcohol, and little red meat. | Compared with LFD or usual dietary habits. | 12 to 224 weeks |
|---------------|-------------|---------------------------------|------------------------------------|------------------------------------------------------------------------------------------------------------------------------------------------------|--------------------------------------------|-----------------|

#### Plant-based diets

| Study author | Country | No. of studies | Participants (n= number) Age (yrs.) | Intervention/ objective (CHO % energy/day) | Comparison/ control (CHO % energy/day) | Duration |
|--------------|---------|----------------|-------------------------------------|--------------------------------------------|----------------------------------------|----------|
|--------------|---------|----------------|-------------------------------------|--------------------------------------------|----------------------------------------|----------|

#### Systematic review with meta-analyses A

|                    |                                                        |                           |                                 |                                                                                                |                                                                      |              |
|--------------------|--------------------------------------------------------|---------------------------|---------------------------------|------------------------------------------------------------------------------------------------|----------------------------------------------------------------------|--------------|
| Viguiliouk, 2015 d | 5 Iran, 3 USA, 1 Canada, 1 Greece 1 Denmark, 1 Germany | 13 RCTs (9 in MA)         | T2D & T1D (n= 280) Age: 30-68 □ | Effect of plant protein on glycemic control. 40-70% energy from CHO (2.5-64g)                  | Includes animal protein, match for energy (isocaloric)               | ≥3 weeks     |
| Viguiliouk, 2019 d | 5 USA, 1 Greece, 1 Brazil, 1 Czech Republic, 1 Korea   | 9 RCTs                    | T2D & T1D (n= 664) Age: 32-61 □ | Effect of vegetarian diets (vegan, lacto-ovo) on HbA1c and risk factors. (49-78: 12-17: 11-34) | Non-vegetarian dietary patterns (47-65: 16-22: 19-37)                | ≥3 weeks     |
| Yokoyama, 2014     | 2 USA, 1 Czech Republic, 1 Brazil (2 USA CTs)          | 6 studies (4 RCTs, 2 CTs) | T2D (n= NR) Age: 44.4-59 □      | Vegetarian diets for glycemic control. (5 LF vegan studies 1 lacto-ovo).                       | Comparator diets include Omnivorous, diabetic diet, ADA diet or LFD. | 4 - 74 weeks |

#### Systematic reviews with no meta-analysis B

|                   |                                                                            |                                   |                           |                                                                                                                   |                                                                           |              |
|-------------------|----------------------------------------------------------------------------|-----------------------------------|---------------------------|-------------------------------------------------------------------------------------------------------------------|---------------------------------------------------------------------------|--------------|
| Toumpanakis, 2018 | 4 USA, 2 Czech Republic, 1 New Zealand, 1 Italy, 1 South Korea (2 USA CTs) | 13 studies (11 RCTs, 2 CTs) 8 T2D | T2D (n= 433) Age: 44-66 □ | Plant-based diet interventions targeting well-being for diabetes. (LF vegan, LF Plant-based, Vegan, Plant-based). | Omnivorous, LF, KDA, ADA, Italian diabetology doctors, European DM study. | 3 - 74 weeks |
|-------------------|----------------------------------------------------------------------------|-----------------------------------|---------------------------|-------------------------------------------------------------------------------------------------------------------|---------------------------------------------------------------------------|--------------|

|                  |             |                                       |                                                  |                                                                                                                                                        |                                                                                                        |              |
|------------------|-------------|---------------------------------------|--------------------------------------------------|--------------------------------------------------------------------------------------------------------------------------------------------------------|--------------------------------------------------------------------------------------------------------|--------------|
| Johannesen, 2020 | Multiple NR | 9 studies (3 RCTs, 6 RTs) 3 including | T2D, o/ wt. or obese/ CVD (n= 250) Age: 50-61 MR | Plant-based diet effect on glucose metabolism. (LF plant-based, LF vegan, Low-calorie lacto-ovo vegetarian, Lacto-ovo vegetarian, Vegan, LF-LGI vegan) | Conventional omnivorous diet (or portion controlled), Low calorie-M diet or diet from KDA, ADA or AHA. | 4 - 22 weeks |
|------------------|-------------|---------------------------------------|--------------------------------------------------|--------------------------------------------------------------------------------------------------------------------------------------------------------|--------------------------------------------------------------------------------------------------------|--------------|

#### Low glycaemic index

| Author of study                      | Country     | No. of studies     | Participants (n= number) Age (yrs.) | Intervention/ objective (CHO % energy/day)                        | Comparison/ control (CHO % energy/day)                         | Duration             |
|--------------------------------------|-------------|--------------------|-------------------------------------|-------------------------------------------------------------------|----------------------------------------------------------------|----------------------|
| Systematic review with meta-analysis |             |                    |                                     |                                                                   |                                                                |                      |
| Ojo, 2018                            | Multiple NR | 9 RCTs (6 with MA) | T2D (n= 705) Age: 42.4-63 □         | Effect of LGI diets with T2D. (GI ≤40 and GI ≤55 for low-GI diet) | Higher-GI diet (GI ≥ 70 for high-GI diet) and/or control diet. | 2 weeks to 103 weeks |
| Zafar, 2019 #                        | Multiple NR | 54 RCTs (23 T2D#)  | T2D (n= #1424) Age: NR              | Assess effects of LGI on glycaemic control.                       | High GI diets                                                  | 1 to 52 weeks        |

#### Multiple intervention diets

| Author of study                        | Country     | No. of studies     | Participants (n= number) Age (yrs.)                                         | Intervention/ objective (CHO % energy/day)                                                                                 | Comparison/ control (CHO % energy/day)                                                | Duration  |
|----------------------------------------|-------------|--------------------|-----------------------------------------------------------------------------|----------------------------------------------------------------------------------------------------------------------------|---------------------------------------------------------------------------------------|-----------|
| Systematic review with meta-analysis A |             |                    |                                                                             |                                                                                                                            |                                                                                       |           |
| Ajala, 2013                            | Multiple NR | 20 RCTs (16 in MA) | T2D (n= 3073: LC= 844, M= 1397, PB= 173, on glycemic LGI= 2129) Age: ≥ 18 Δ | Effect of various diets on glycemic control, lipids & wt. loss (LC, vegetarian, vegan, LGI, high-fiber, M diet, HP diets). | LF, High-GI, LP or ADA diet or European Association for Study of Diabetes Guidelines. | ≥26 weeks |

#### Systematic review with no meta-analysis B

|                   |                                                             |                                          |                                        |                                                                                                                                                                |                                                                                                                   |                  |
|-------------------|-------------------------------------------------------------|------------------------------------------|----------------------------------------|----------------------------------------------------------------------------------------------------------------------------------------------------------------|-------------------------------------------------------------------------------------------------------------------|------------------|
| de Carvalho, 2020 | 1 USA, 1 Italy, 1 Iran, 1 Czech Republic, 1 Canada, 1 Korea | 6 studies (4 RCTs) 1 cross-over 1 cohort | T2D (n= 690)<br>Age: 30-82             | Different dietary patterns for glycaemic control. (LF vegan diet (%CHO 75: P 15: F 10) M diet (F: <30%, CHO <50%) veg diet (%CHO 60: P 15: F: 25), DASH diet). | Conventional diet (%CHO 60-70: P 15-20:SFA<7), LF diet (<30% SFA<7%), diabetic diet (%CHO 50: P 20: F 30 SFA>7%). | 8 to 20 weeks    |
| Emadian, 2015     | Multiple NR                                                 | 11 RCTs                                  | T2D, o/ wt. or obese (n= 1266) Age: NR | Effect on glycaemic control with LF vegan, LGI, HP, standard protein, LC, low GL, LC, TM, HC-fibre & modified lipid diets.                                     | Various control diets. Studies had at least two arms. LF, ADA diet, HC diets, standard protein.                   | Minimum 26 weeks |
| Papamichou, 2019  | Multiple NR                                                 | 20 RCTs                                  | T2D (n= 2223) Age: >18 Δ               | Effect of LC, macrobiotic, vegan, vegetarian, M diet, on glycemic control.                                                                                     | LF diet                                                                                                           | ≥28 weeks        |

*Note. One systematic review with meta-analyses and three systematic reviews examined multiple intervention diets for people with type 2 diabetes including those overweight or obese. a = Paleolithic diets. b = High protein diets. c = Monounsaturated fatty acid (MUFA). d = includes type 1 diabetes (T1D).# = subgroup data. Δ = No upper limit for age reported. □ = Age as range of means. Abbreviations: ADA = American Diabetes Association; AHA = American Heart Association; Ax = assessment; CCTs = controlled clinical trials; CHO = carbohydrate; CI = confidence interval; CVD = cardiovascular disease; DA = Diabetes Association; DASH = dietary approaches to stop hypertension; FBG = fasting blood glucose; GDM = gestational diabetes mellitus; LGI = Low-glycaemic Index; GL = glycaemic load; GMD = glucose metabolism disorders; HbA1c = haemoglobin A1c; HC, high carbohydrate; JDA = Japanese Diabetes Association; KDA = Korean Diabetes Association; LC = low carbohydrate; LF = low fat; LP = low protein; MA = meta-analysis; M diet = Mediterranean diet; MS = Mean sample; MUFA = monounsaturated fatty acid; Mx = management; NR = not reported; NS = no significant differences; PUFA = polyunsaturated fatty acid; PWD = people with diabetes; RCT = randomized control trial SR = systematic review; T1D = type 1 diabetes; T2D = type 2 diabetes; TE = total energy; TM = traditional Mediterranean; UK = United Kingdom; Wt = weight.*
