# Supplementary material for: Determining Dietary Patterns to Recommend for Type 2 Diabetes: An Umbrella Review
Source: MDPI journal article supplement (doi:10.3390/nu15040861), 2023-02-08
Supplement: s1 [file s1]

**Supplementary Table S9 Conclusions and quality appraisal of dietary patterns for diabetes**

| Low-carbohydrate diet (LCD) reviews    |                                                                                             |                                                                                                                                                                          |          |              |
|----------------------------------------|---------------------------------------------------------------------------------------------|--------------------------------------------------------------------------------------------------------------------------------------------------------------------------|----------|--------------|
| Review first author                    | Rating methodology                                                                          | Conclusions, identified bias and limitations by authors                                                                                                                  | Quality  | Risk of bias |
| Systematic review with meta-analysis A |                                                                                             |                                                                                                                                                                          |          |              |
| Fan, 2016                              | Jadad scale. Two reviewers using Stata software for MA                                      | Significant decrease in HbA1c with LC diets. All were more effective for weight loss than control groups, four studies showed greater results.                           | Moderate | Unclear      |
| Goldenberg, 2021 #                     | Cochrane risk of bias tool RoB 2.0. GRADE Assessment. Sensitivity ratings with NutriGRAD E. | Moderate to low certainty for diabetes remission with LCDs. Minimal clinically important differences. Safety concerns long term and confounding of calorie restrictions. | Moderate | Unclear      |

|                     |                                                                        |                                                                                                                                                                     |          |         |
|---------------------|------------------------------------------------------------------------|---------------------------------------------------------------------------------------------------------------------------------------------------------------------|----------|---------|
| Huntriss, 2018      | Cochrane bias risk tool used to assess.                                | Improvements with LC diets including weight loss, HbA1c reduced in seven studies. Adherence to VLCD a concern but LC diet achievable.                               | Low      | Unclear |
| Jamka, 2020 a       | Cochrane tool. Comprehensive MA software. Three independent reviewers. | Paleolithic diets in three studies did not differ from other types of healthy diets with effect on HbA1c. No difference in wt. loss for Paleo versus control diets. | Moderate | High    |
| Korsmo-Haugen, 2018 | Cochrane tool. GRADE Assessment. Reviewed by two authors.              | LC diets related to overall HbA1c reduction. A range of dietary patterns are suitable, including M diet.                                                            | Low      | Unclear |

|               |                                                                                        |                                                                                                                                                                   |          |         |
|---------------|----------------------------------------------------------------------------------------|-------------------------------------------------------------------------------------------------------------------------------------------------------------------|----------|---------|
| Li, 2021      | Cochrane risk of bias tool RoB 2.0. Stata software for regression test. Two reviewers. | LC diets can improve HbA1c and weight. Practical constraints and medication changes not considered. Outcomes founded by weight change. Renal safety is uncertain. | Moderate | Unclear |
| McArdle, 2019 | Cochrane handbook PRISMA statement. PROSPER O published protocol.                      | No overall pooled effect on HbA1c for restricting CHO. Significant change in HbA1c for short-term subgroup trials to 6 months.                                    | Low      | Unclear |
| Meng, 2017    | Modified Jadad scale, scored 0 to 7 (>4 high quality). Two authors.                    | Significant effect on glucose control (HbA1c), positive effect on TG and HDL but not long-term wt. loss.                                                          | High     | Unclear |

|               |                                                              |                                                                                                                                                          |     |         |
|---------------|--------------------------------------------------------------|----------------------------------------------------------------------------------------------------------------------------------------------------------|-----|---------|
| Naude, 2014 # | Cochrane Collaboration tool. Two authors. GRADE for quality. | Little or no changes in HbA1c and CVD risk between diets at 3–6 mo. and 1–2 yrs. No mean difference in weight loss with LC diets. Adherence problematic. | Low | Unclear |
|---------------|--------------------------------------------------------------|----------------------------------------------------------------------------------------------------------------------------------------------------------|-----|---------|

|                 |                                           |                                                                                                                                     |     |     |
|-----------------|-------------------------------------------|-------------------------------------------------------------------------------------------------------------------------------------|-----|-----|
| Sainsbury, 2017 | Cochrane handbook tool and two reviewers. | CHO restricted diets had greater reduction in HbA1c at 3–6 months. Subgroup of LC diet <26% total energy from CHO favours wt. loss. | Low | Low |
|-----------------|-------------------------------------------|-------------------------------------------------------------------------------------------------------------------------------------|-----|-----|

|                 |                                                                                 |                                                                                                                                      |          |         |
|-----------------|---------------------------------------------------------------------------------|--------------------------------------------------------------------------------------------------------------------------------------|----------|---------|
| Snorgaard, 2017 | AMSTAR quality tool. Covidence & AGREE II software. MA using PICO. Two authors. | LC diets have greater effect on glycemic control, reducing HbA1c in first year. The greater CHO restriction, the more HbA1c lowered. | Moderate | Unclear |
|-----------------|---------------------------------------------------------------------------------|--------------------------------------------------------------------------------------------------------------------------------------|----------|---------|

|                  |                                                                              |                                                                                                                        |     |         |
|------------------|------------------------------------------------------------------------------|------------------------------------------------------------------------------------------------------------------------|-----|---------|
| van Zuuren, 2018 | Cochrane risk tool. Two authors assessed risk. CCTs used ROBINS-I. GRADE Ax. | CHO reduction favours glycemic control slightly but with uncertain clinical importance. Compliance issues.             | Low | Unclear |
| Yu, 2020 b       | Cochrane handbook for systematic reviews.                                    | High protein diets do not significantly improve glycemic control or blood pressure but can lower blood lipid profiles. | Low | Low     |

#### Systematic review with no meta-analysis B

|                |                                                                                      |                                                                                                                                                      |          |         |
|----------------|--------------------------------------------------------------------------------------|------------------------------------------------------------------------------------------------------------------------------------------------------|----------|---------|
| Malaeb, 2019 b | Cochrane handbook and two authors. Rayyan tool, Oxford EB-medicine.                  | High protein diet has no consistent benefit or negative effects. Insufficient evidence for plant vs. animal protein. Compliance and drop out issues. | Low      | Unclear |
| Yamada, 2018   | Assessed risk of bias with (Minds) Medical Information Network Distribution Service. | CHO restricted diet not energy restricted diet, may have short term glycaemic benefits.                                                              | Moderate | Low     |

#### Mediterranean diet (MDiet) reviews

| Review author                          | Rating methodology                                                            | Conclusions, identified bias and limitations by authors                                                                                                             | Quality  | Risk of bias |
|----------------------------------------|-------------------------------------------------------------------------------|---------------------------------------------------------------------------------------------------------------------------------------------------------------------|----------|--------------|
| Systematic review with meta-analysis A |                                                                               |                                                                                                                                                                     |          |              |
| Esposito, 2015                         | Cochrane tool. Two reviewers and GRADE.                                       | M diets associated with better glycaemic control and reduced CVD risk factors than control diets. Analysis of three long-term trials showed significant difference. | Moderate | Low          |
| Huo, 2015                              | Cochrane Collaborators tool. PRISMA reporting. Two independent investigators. | Mediterranean style diets improve outcomes for glycaemic control, body weight and CVD risk.                                                                         | High     | Low          |

|              |                                                         |                                                                                                                                                       |          |     |
|--------------|---------------------------------------------------------|-------------------------------------------------------------------------------------------------------------------------------------------------------|----------|-----|
| Qian, 2016 c | Cochrane Collaborators tool. Two independent reviewers. | High MUFA diets improve glycaemic control and metabolic risk factors with reduced plasma glucose, lipids, and wt. loss. Long- and short-term studies. | Moderate | Low |
|--------------|---------------------------------------------------------|-------------------------------------------------------------------------------------------------------------------------------------------------------|----------|-----|

#### Systematic review with no meta-analysis B

|               |                 |                                                                              |     |         |
|---------------|-----------------|------------------------------------------------------------------------------|-----|---------|
| Sleiman, 2015 | Quality tool NR | Most studies show favorable effects of the MDiet on glycemic control and CVD | Low | Unclear |
|---------------|-----------------|------------------------------------------------------------------------------|-----|---------|

#### Plant-based diet reviews

| Review author | Rating methodology | Conclusions, identified bias and limitations by authors | Quality | Risk of bias |
|---------------|--------------------|---------------------------------------------------------|---------|--------------|
|---------------|--------------------|---------------------------------------------------------|---------|--------------|

#### Systematic review with meta-analysis A

|                     |                                                                 |                                                                                                        |     |         |
|---------------------|-----------------------------------------------------------------|--------------------------------------------------------------------------------------------------------|-----|---------|
| Viguioliouk, 2015 d | Cochrane risk tool. Heyland Methodological Quality Score (MQS). | Overall replacing animal with plant protein leads to significant modest increases in glycemic control. | Low | Unclear |
|---------------------|-----------------------------------------------------------------|--------------------------------------------------------------------------------------------------------|-----|---------|

|                   |                                                        |                                                                                                                                               |          |         |
|-------------------|--------------------------------------------------------|-----------------------------------------------------------------------------------------------------------------------------------------------|----------|---------|
| Vigiliouk, 2018 d | Cochrane risk tool. GRADE approach. Two investigators. | Vegetarian diets significantly lower HbA1c, FBG, FFI, weight and LDL-cholesterol but have no effect on other blood lipids and blood pressure. | Moderate | Unclear |
|-------------------|--------------------------------------------------------|-----------------------------------------------------------------------------------------------------------------------------------------------|----------|---------|

|                |                                                    |                                                                                                                                   |     |         |
|----------------|----------------------------------------------------|-----------------------------------------------------------------------------------------------------------------------------------|-----|---------|
| Yokoyama, 2014 | Cochrane handbook criteria for systematic reviews. | Vegetarian diets associated with significant reduction in HbA1c compared to control diets, greater in two non-randomised studies. | Low | Unclear |
|----------------|----------------------------------------------------|-----------------------------------------------------------------------------------------------------------------------------------|-----|---------|

#### Systematic reviews with no meta-analysis *B*

|                   |                                                       |                                                                                                                                                     |     |         |
|-------------------|-------------------------------------------------------|-----------------------------------------------------------------------------------------------------------------------------------------------------|-----|---------|
| Johannese n, 2020 | McMaster University quality Ax tool. Two researchers. | Plant-based diet favorable for glycemic control with T2D &/or obesity. one of three RCTs significantly improve glycemic control. Compliance issues. | Low | Unclear |
|-------------------|-------------------------------------------------------|-----------------------------------------------------------------------------------------------------------------------------------------------------|-----|---------|



|                   |                                                  |                                                                                                                                                                |     |         |
|-------------------|--------------------------------------------------|----------------------------------------------------------------------------------------------------------------------------------------------------------------|-----|---------|
| Toumpanakis, 2018 | Quality tool NR. PRISMA checklist and flowchart. | Plant-based diets with educational interventions can significantly improve psychological health, QOL, HbA1c and weight. Adherence has greater HbA1c reduction. | Low | Unclear |
|-------------------|--------------------------------------------------|----------------------------------------------------------------------------------------------------------------------------------------------------------------|-----|---------|

#### Low Glycaemic Index (LGI) diet reviews

| Review author                                 | Rating methodology                                                      | Conclusions, identified bias and limitations by authors                                                                                               | Quality  | Risk of bias |
|-----------------------------------------------|-------------------------------------------------------------------------|-------------------------------------------------------------------------------------------------------------------------------------------------------|----------|--------------|
| <b>Systematic review with meta-analysis A</b> |                                                                         |                                                                                                                                                       |          |              |
| Ojo, 2019                                     | Critical Appraisal Skills Program Evaluation checklist. PICOS criteria. | LGI diets more effective in controlling HbA1c and FBG compared with higher-GI or control diets for T2D.                                               | Moderate | Low          |
| Zafar, 2019 #                                 | Cochrane Collaboration tool. Two reviewers.                             | LGI diet may be useful for glycaemic control compared to other diet types. May not be effective in achieving wt. loss in people with type 2 diabetes. | Low      | High         |

#### Multiple intervention diet reviews

| Review author                                 | Rating methodology                                                         | Conclusions, identified bias and limitations by authors                                                                                                                                                               | Quality | Risk of bias |
|-----------------------------------------------|----------------------------------------------------------------------------|-----------------------------------------------------------------------------------------------------------------------------------------------------------------------------------------------------------------------|---------|--------------|
| <b>Systematic review with meta-analysis A</b> |                                                                            |                                                                                                                                                                                                                       |         |              |
| Ajala, 2013                                   | Cochrane Collaboration tool. PRISMA guidelines. Cohort-type using ROBINS-1 | LC, LGL, M diet and HP diets all lead to significantly improved glycemic control compared with control. Largest HbA1c effect size was M diet. Wt. loss favours M diet, not significant in LC, LGL, no benefit in HPD. | High    | Unclear      |

|                                                  |                                                                            |                                                                                                                                                             |          |         |
|--------------------------------------------------|----------------------------------------------------------------------------|-------------------------------------------------------------------------------------------------------------------------------------------------------------|----------|---------|
| <b>Systematic review with no meta-analysis B</b> |                                                                            |                                                                                                                                                             |          |         |
| de Carvalho, 2020                                | Cochrane tool for RCTs and crossover studies. ROBINS-I for cohort studies. | Dietary patterns vegan/vegetarian/ M diet/ DASH all favoured glycemic control, in reduction of HbA1c. Most diets studied were vegan or vegetarian patterns. | Moderate | Unclear |

|                  |                                            |                                                                                                                         |     |         |
|------------------|--------------------------------------------|-------------------------------------------------------------------------------------------------------------------------|-----|---------|
| Emadian,<br>2015 | JB critical appraisal tool. Two reviewers. | 4 of 11 trials show promise in improving HbA1c levels including LC-M diet, LF-Vegan, LGI diets, independent of wt loss. | Low | Unclear |
|------------------|--------------------------------------------|-------------------------------------------------------------------------------------------------------------------------|-----|---------|

|                  |                             |                                                                                                                                                                                                  |          |      |
|------------------|-----------------------------|--------------------------------------------------------------------------------------------------------------------------------------------------------------------------------------------------|----------|------|
| Papamichou, 2019 | Cochrane risk of bias tool. | No significant change in glycemic control or wt in LC diets. Vegan, macrobiotic diets improved HbA1c. M diet showed reduction in HbA1c, wt. and delayed medications. Vegetarian diet reduced wt. | Moderate | High |
|------------------|-----------------------------|--------------------------------------------------------------------------------------------------------------------------------------------------------------------------------------------------|----------|------|

---

*Note. The Cochrane Collaboration assessment tool was used to rate each individual review for biases. A = Systematic reviews with meta-analysis – HbA1c and wt reduction are based on meta-analysis outcomes. B = Systematic reviews (without meta-analysis) – HbA1c and wt reduction are based on statistical analysis of individual reviews. a = Paleolithic diets. b = High protein diets. c = Monounsaturated fatty acid (MUFA). d = includes type 1 diabetes (T1D). # = subgroup data.*

*Abbreviations: Cal = calorie; CHO = carbohydrate; Cochrane = a global independent network of researchers; CVD = cardiovascular disease; ER = energy restricted; GRADE = grading approach for quality of evidence and strength of recommendations; HE = healthy eating; HCP = High carbohydrate diet; HPD = high protein diet; JBI = Joanna Briggs Institute; LC = Low-carbohydrate; LCMD = Low-carbohydrate Mediterranean diet; LF = low fat; LGI = Low-glycaemic index; MCD = moderate carbohydrate diet; MD = mean difference; M diet = Mediterranean diet; MUFA = monounsaturated fatty acids; NR = not reported; NS = not significant; Paleo = Paleolithic diet; RCT = randomised control trial; PICO = population, intervention, comparator, and outcomes; PRISMA = statement for reporting SR and MA of studies that evaluate health care interventions; SD = significant different; T2D = type 2 diabetes; TE = total energy; veg = vegetables; WMD = weighted mean difference; wt. = weight.*
