# Supplementary material for: Determining Dietary Patterns to Recommend for Type 2 Diabetes: An Umbrella Review
Source: MDPI journal article supplement (doi:10.3390/nu15040861), 2023-02-08
Supplement: s1 [file s1]

**Supplementary Table S8** Results from reviews on cardiovascular markers among different dietary patterns:  
Dietary interventions versus control diets difference in cardiovascular outcome

| First author, year (reference)                                         | Systolic blood pressure (SBP, mm/Hg)                                 | Diastolic blood pressure (DBP, mm/Hg)                                | Total cholesterol (TC, mmol/L)                                         | Low density lipoprotein (LDL-C, mmol/L)                                | High density lipoprotein (HDL-C, mmol/L)                                     | Triglycerides (TG, mmol/L)                                             |
|------------------------------------------------------------------------|----------------------------------------------------------------------|----------------------------------------------------------------------|------------------------------------------------------------------------|------------------------------------------------------------------------|------------------------------------------------------------------------------|------------------------------------------------------------------------|
| <b>Low-carbohydrate diets – Systematic review with meta-analysis A</b> |                                                                      |                                                                      |                                                                        |                                                                        |                                                                              |                                                                        |
| Fan, 2016                                                              | NR                                                                   | NR                                                                   | No difference, NS. WMD -0.05 mmol/L (95% CI -0.14, 0.24) P=0.6         | No difference, NS. WMD -0.03 mmol/L (95% CI -0.10, 0.05) P=0.5         | Significantly favours, WMD 0.094 mmol/L (95% CI 0.04, 0.14) P<0.001          | Significantly favours, WMD -0.28 mmol/L (95% CI 0.39, -0.16) P<0.001   |
| Goldenberg, 2021                                                       | NR                                                                   | NR                                                                   | No difference, NS. MD -0.1 (95% CI -0.41, 0.20) P=NR                   | No difference, NS. MD -0.02 (95% CI -0.09, 0.12) P=NR                  | No difference, NS. MD -0.06 (95% CI -0.01, 0.10) P=NR                        | No difference, NS. MD -0.3 (95% CI -0.43, 0.17) P=NR                   |
| Huntriss, 2018                                                         | Significantly favours, MD -2.74 mm/Hg (95% CI -5.27, -0.20) P=0.03   | No difference, NS. MD -0.99 mm/Hg (95% CI -2.24, 0.25) P=0.1         | Favours, NS. LCD MD -0.08 mmol/L (95% CI -0.23, 0.08) P=0.4            | No difference, NS. MD 0.05 mmol/L (95% CI -0.10, 0.19) P=0.5           | Significantly favours, MD 0.06 mmol/L (95% CI 0.04, 0.09) P=0.00001          | Significantly favours, MD -0.24 mmol/L (95% CI -0.35, -0.13) P=0.0001  |
| Korsmo-Haugen, 2018                                                    | No difference, NS. MD -0.9 mm/Hg (95% CI -2.24, 0.37) P=0.4          | No difference, NS. MD -0.2 mm/Hg (95% CI -1.20, 0.79) P=0.65         | No difference, NS. MD 0.04 mmol/L (95% CI -0.12, 0.20) P=0.5           | No difference, NS. MD 0.01 mmol/L (95% CI -0.13, 0.11) P=0.4           | No difference, NS. MD 0.04 mmol/L (95% CI -0.01, 0.10) P=0.1                 | Favours, NS. LCD MD -0.1 mmol/L (95% CI -0.24, -0.02) P=0.5            |
| Li, 2021                                                               | No difference, NS. MD 0.8 (95% CI -0.03, 0.25) P=0.6                 | No difference, NS. MD 0.2 (95% CI -1.71, 2.17) P=8.2                 | No difference, NS. MD -0.1 (95% CI -0.03, 0.25) P=0.1                  | No difference, NS. MD -0.03 (95% CI -0.06, 0.12) P=0.5                 | Significantly favours, MD 0.1 (95% CI 0.05, 0.13) P=0.00001                  | Significantly favours, MD -0.2 (95% CI -0.31, 0.10) P=0.0001           |
| Meng, 2017                                                             | NR                                                                   | NR                                                                   | No difference, NS. WMD 0.06 mmol/L (95% CI -0.08, 0.21) P=0.6          | No difference, NS. WMD -0.04 mmol/L (95% CI -0.08, 0.16) P=1.0         | Significantly favours, WMD 0.07 mmol/L (95% CI 0.03, 0.11), P=0              | No difference, NS. WMD -0.3 mmol/L (95% CI -0.45, -0.21) P=0.7         |
| Naude, 2014 #                                                          | No difference, NS. 3-6 mo. MD 0.6 mm/Hg, 1-2yrs. MD 0.31 mm/Hg, P=NR | No difference, NS. 3-6 mo. MD 0.8 mm/Hg, 1-2yrs. MD 0.09 mm/Hg, P=NR | No difference, NS. 3-6 mo. MD 0.04 mmol/L, 1-2yrs. MD 0.1 mmol/L, P=NR | No difference, NS. 3-6 mo. MD 0.06 mmol/L, 1-2yrs. MD 0.1 mmol/L, P=NR | No difference, NS. 3-6 mo. MD 0.01 mmol/L, 1-2yrs. MD 0.08-0.09 mmol/L, P=NR | No difference, NS. 3-6 mo. MD 0.2 mmol/L, 1-2yrs. MD 0.08 mmol/L, P=NR |

|                  |                                                                                                 |                                                                                                                  |                                                                                                         |                                                                                                        |                                                                                                       |                                                                                                      |
|------------------|-------------------------------------------------------------------------------------------------|------------------------------------------------------------------------------------------------------------------|---------------------------------------------------------------------------------------------------------|--------------------------------------------------------------------------------------------------------|-------------------------------------------------------------------------------------------------------|------------------------------------------------------------------------------------------------------|
| Sainsbury, 2018  | No difference, NS. MD -0.2 to -16.6 mm/Hg, P= ° unclear                                         | No difference, NS. MD -0.93 to -10.0 mm/Hg, P= ° unclear                                                         | No difference, NS. 3 mo. MD ranges 0.05 to 0.1 mmol/L, 12 mo. MD ranges 0.2 to 0.1 mmol/L, P= ° unclear | No difference, NS. 3 mo. MD ranges 0.2 to 2.0 mmol/L, 12 mo. MD ranges 0.2 to 0.3 mmol/L, P= ° unclear | No difference, NS. 3 mo. MD ranges 0.9 to 0 mmol/L, 12 mo. MD ranges 0.2 to 0.03 mmol/L, P= ° unclear | No difference, NS. 3 mo. MD ranges -0.02 to -0.8, 12 mo. MD ranges -0.3 to -0.7 mmol/L, P= ° unclear |
| Snorgaard, 2017  | NR                                                                                              | NR                                                                                                               | NR                                                                                                      | No difference, NS. < 1 yr. MD 0.04 (0.13 to -0.06) more than yr. MD -0.01mmol/L (-0.01 to -0.07) P=NR  | NR                                                                                                    | NR                                                                                                   |
| van Zuuren, 2018 | No difference, NS. MD 8wk - 2.0 mm/Hg (95% CI -25.29, 11.29) 2yrs, 0.8 mm/Hg (-3.68, 5.21) P=NR | No difference, NS. MD 8wk 5.0 mm/Hg (-1.67, 11.67) 2yrs, 0.08 (95% CI 2yrs. 0.08 mm/Hg (95% CI -2.56, 2.39) P=NR | NR                                                                                                      | No difference, NS. MD 8wk - 0.07 mmol/L (-0.41, 0.27) P = 0.7, 2yrs 0.06 mmol/L (-0.08, 0.21) P=0.4    | Favours, NS. MD 8wk 0.1 mmol/L (0.00 to 0.25) P=0.05, 2yrs. 0.1mmol/L (0.07, 0.17) P<0.00001          | Favours, NS. MD 8wk -0.3 mmol/L (-0.76 to 0.14) P=0.2, 2yrs. -0.2 mmol/L (-0.32, -0.05) P=0.007#     |
| Yu, 2019 b       | No difference, NS. MD -0.6 mm/Hg, (95% CI -2.45, 1.31) P=0.55                                   | No difference, NS. MD -0.7 mm/Hg, (95% CI -2.48, 1.02) P=0.4                                                     | Significantly favours, MD -0.2 mmol/L (95% CI -0.31, -0.12), P=0.00001                                  | Significantly favours, MD -0.1 mmol/L (95% CI -0.18, -0.02), P=0.02                                    | No difference, NS. MD 0.03 mmol/L (95% CI -0.04, 0.11), P=0.4                                         | Significantly favours, MD -0.2 mmol/L (95% CI -0.33, -0.05), P=0.007                                 |

#### Mediterranean diets – Systematic review with meta-analysis A

|              |                                                                   |                                                            |                                                                  |                                                              |                                                                   |                                                                     |
|--------------|-------------------------------------------------------------------|------------------------------------------------------------|------------------------------------------------------------------|--------------------------------------------------------------|-------------------------------------------------------------------|---------------------------------------------------------------------|
| Huo, 2015    | Favours, NS. MSD -0.5 mmHg (95% CI -1.91, -0.94) P=NR             | Favours, NS. MSD -1.4 mmHg, (95% CI -1.84, -0.97) P=NR     | Significantly favours, MD -0.1 mmol/L (95% CI -0.19, -0.09) P=NR | No difference, NS. MD -0.1 mmol/l (95% CI -0.24, 0.01) P=NR  | Favours, NS. MD 0.06 mmol/L (95% CI 0.02, 0.10) P=NR              | Significantly favours, MD -0.3 mmol/L (95% CI -0.47, -0.10) P=NR    |
| Quan, 2016 c | Significantly favours, WMD -2.3 mmHg (95% CI -4.13, -0.49) P<0.05 | No difference, NS. WMD -2.6 mmHg (95% CI -5.92, 0.63) P=NR | NR                                                               | No difference, NS. WMD 0.05 mmol/L (95% CI -0.07, 0.16) P=NR | Significantly favours, WMD 0.06 mmol/L (95% CI 0.02, 0.10) P<0.05 | Significantly favours, WMD -0.3 mmol/L (95% CI -0.44, -0.18) P<0.05 |

#### Vegetarian or plant-based diets – Systematic review with meta-analysis A

|                    |                                                             |                                                             |    |                                                                      |                                                                |                                                              |
|--------------------|-------------------------------------------------------------|-------------------------------------------------------------|----|----------------------------------------------------------------------|----------------------------------------------------------------|--------------------------------------------------------------|
| Viguiliouk, 2019 d | No difference, NS. SMD 0.1 mm/Hg (95% CI -2.33, 2.52) P=0.2 | No difference, NS. SMD 0.5 mm/Hg (95% CI -0.50, 1.57) P=0.5 | NR | Significantly favours, SMD -0.1 mmol/L (95% CI -0.20, -0.04) P=0.002 | No difference, NS. SMD -0.03 mmol/L (95% CI -0.08, 0.02) P=0.2 | No difference, NS. SMD 0.1 mmol/L (95% CI -0.10, 0.38) P=0.3 |
|--------------------|-------------------------------------------------------------|-------------------------------------------------------------|----|----------------------------------------------------------------------|----------------------------------------------------------------|--------------------------------------------------------------|

#### Low-glycaemic Index diets – Systematic review with meta-analysis A

|               |    |    |                                                                                                |                                                                                                |                                                                                            |                                                                                                |
|---------------|----|----|------------------------------------------------------------------------------------------------|------------------------------------------------------------------------------------------------|--------------------------------------------------------------------------------------------|------------------------------------------------------------------------------------------------|
| Zafar, 2019 # | NR | NR | No sig<br>difference in<br>25 studies,<br>SMD -0.12<br>mmol/L (95%<br>CI -0.25, -0.00)<br>P=NR | No sig<br>difference in<br>23 studies,<br>SMD -0.13<br>mmol/L (95%<br>CI -0.23, -0.02)<br>P=NR | No sig<br>difference 23<br>studies, SMD -<br>0.01 mmol/L<br>(95% CI -0.09, -<br>0.12) P=NR | No sig<br>difference in<br>25 studies,<br>SMD -0.09<br>mmol/L (95%<br>CI -0.22, -0.04)<br>P=NR |
|---------------|----|----|------------------------------------------------------------------------------------------------|------------------------------------------------------------------------------------------------|--------------------------------------------------------------------------------------------|------------------------------------------------------------------------------------------------|

| Multiple diets – Systematic review with meta-analysis A |    |    |    |                                                                                                                                                                  |                                                                                                                                                                          |                                                                                                                                                                  |
|---------------------------------------------------------|----|----|----|------------------------------------------------------------------------------------------------------------------------------------------------------------------|--------------------------------------------------------------------------------------------------------------------------------------------------------------------------|------------------------------------------------------------------------------------------------------------------------------------------------------------------|
| Ajala 2013 e                                            | NR | NR | NR | LC diet: No<br>difference, NS.<br>WMD -0.03<br>(95% CI -0.12,<br>0.07) P = 0.57<br>(HPD: no<br>difference<br>WMD -0.2<br>mmol/L (95%<br>CI -0.41, 0.09)<br>P=0.2 | LC diet:<br>Significantly,<br>favours, WMD<br>0.08 (95% CI<br>0.05, 0.11)<br>P<0.00001,<br>(HPD: no<br>difference,<br>WMD<br>0.01mmol/L<br>(95% CI -0.08,<br>0.10) P=0.9 | LC diet: No<br>difference, NS.<br>WMD -0.04<br>(95% CI -0.15,<br>0.07) P=0.47,<br>(HPD: no<br>difference<br>WMD -0.1<br>mmol/L (95%<br>CI -0.56, 0.33)<br>P=0.61 |
|                                                         |    |    |    | M diet: No<br>difference, NS.<br>WMD -0.08<br>mmol/L (95%<br>CI -0.24, 0.08)<br>P=0.3                                                                            | M diet:<br>Significantly<br>favours, WMD<br>0.04 mmol/L<br>(95% CI 0.01,<br>0.07) P=0.004                                                                                | M diet:<br>Significantly<br>favours, WMD<br>-0.2 mmol/L<br>(95% CI -0.29, -<br>0.14)<br>P<0.00001)                                                               |
|                                                         |    |    |    | LGI diet: No<br>difference, NS.<br>WMD -0.07<br>mmol/L (95%<br>CI -0.16, 0.02)<br>P=0.2                                                                          | LGI diet:<br>Significantly<br>favours, WMD<br>0.05 mmol/L<br>(95% CI 0.02,<br>0.07)<br>P<0.0001                                                                          | LGI diet: No<br>difference, NS.<br>WMD -0.07<br>mmol/L (95%<br>CI -0.16, 0.02)<br>P=0.2                                                                          |

Note. Review studies not included have limited or no records of cardiovascular measures. A = Systematic reviews with meta-analysis – HbA1c and wt reduction are based on meta-analysis outcomes. a = Paleolithic diets. b = High protein diets. c = Monounsaturated fatty acid (MUFA). d = includes type 1 diabetes (T1D). e = sytematic reviews that compare multiple dietary patterns are incorporated. # = subgroup data. ^ = 12mo data. ° unclear = range of P values mainly not reported or not significant. Abbreviations: CHO = carbohydrate; HPD = high protein diet; LC = Low-carbohydrate; LGI = low glycaemic index; M diet = Mediterranean diet; mo. = month; NR = not reported; NS = not significant; SD = standard deviation; SMD = standardised mean difference; T1D = type 1 diabetes; T2D = type 2 diabetes; WMD = weighted mean difference.
